# Supplementary material
Source: PubMed Central journal article supplement (PMC2742388)
Supplement: NIHMS71490-supplement-01.pdf [file NIHMS71490-supplement-01.pdf]

**Supplemental Table 1. Retinal thickness and visual acuity outcomes.**

|                   | Week   |        |        |       |       |
|-------------------|--------|--------|--------|-------|-------|
|                   | 0      | 3-4    | 12-16  | 24-28 | 48-52 |
| <b>Patient 1</b>  |        |        |        |       |       |
| OD: BCVA          | 83     | 87     | 79     | 85    | 73    |
| OCT (µm)          | 237    | 253    | 249    | 241   | 287   |
| OS: BCVA          | 90     | 92     | 88     | 85    | 82    |
| OCT (µm)          | 223    | 223    | 254    | 260   | 325   |
| <b>Patient 2</b>  |        |        |        |       |       |
| OD: BCVA          | 77     | 76     | 82     | 78    | 80    |
| OCT (µm)          | 242    | 256    | 177    | 217   | 162   |
| OS: BCVA          | 60     | 63     | 68     | 78    | 77    |
| OCT (µm)          | Unable | Unable | 213    | 195   | 193   |
| <b>Patient 3</b>  |        |        |        |       |       |
| OD: BCVA          | 65     | 65     | 79     | --    | 84    |
| OCT (µm)          | Unable | Unable | Unable | --    | 205   |
| OS: BCVA          | 68     | 82     | 79     | --    | 85    |
| OCT (µm)          | 297    | 233    | 205    | --    | 331   |
| <b>Patient 4</b>  |        |        |        |       |       |
| OD: BCVA          | 71     | 73     | 79     | 78    | 79    |
| OCT (µm)          | --     | 141    | 136    | 130   | 139   |
| OS: BCVA          | 59     | 49     | 50     | 35    | 87    |
| OCT (µm)          | --     | 180    | Unable | 169   | 169   |
| <b>Patient 5*</b> |        |        |        |       |       |
| OD: BCVA          | 74     | 71     | 74     | 73    | --    |
| OCT (µm)          | --     | 304    | 278    | 296   | --    |
| OS: BCVA          | 35     | 57     | 71     | 74### | --    |
| OCT (µm)          | --     | --     | 285    | 245   | --    |

\* Patient 5 elected to withdraw from the study at the 28-week follow-up visit due to travel constraints. At the time of study withdrawal, he was improving from a flare of his uveitis, deemed likely secondary to his missed daclizumab infusion at week 20.

# Note: Patient underwent cataract surgery in the left eye for a visually significant posterior subcapsular cataract. This eye was excluded from statistical analysis of pre- and post-study visual acuities.

### Patient was given sub-Tenon's triamcinolone acetate (40 mg) for uveitic flare OS at week 24. Visual acuity at that time was 55 ETDRS letters. VA subsequently improved to 74 letters at his week 28 visit.
